# Supplementary material for: Removal of phosphorus and fluorine from wastewater containing PF6−via accelerated decomposition by Al3+ and chemical precipitation for hydrometallurgical recycling of lithium-ion batteries
Source: Royal Society of Chemistry journal article supplement (doi:10.1039/d3ew00854a), 2024-01-01
Supplement: d3ew00854a1.pdf [file d3ew00854a1.pdf]

## Electronic Supplementary Information

### Title

Removal of phosphorus and fluorine from wastewater containing  $\text{PF}_6^-$  via accelerated decomposition by  $\text{Al}^{3+}$  and chemical precipitation for hydrometallurgical recycling of lithium-ion batteries

### Author names

Takuto Miyashita\*, Kouji Yasuda\* and Tetsuya Uda\*

### Affiliations:

Department of Materials Science and Engineering, Graduate School of Engineering, Kyoto University,  
Kyoto, 606-8501, Japan.

\*Corresponding authors

**Table S-1 Concentrations of F<sup>-</sup> measured by fluoride-ion selective electrode in the sample solutions dissolving Al<sub>2</sub>(SO<sub>4</sub>)<sub>3</sub> and NaF mixed with TISAB 1 or 2 solution.**

| <b>Prepared F<sup>-</sup> conc.<br/>(ppm)</b> | <b>Prepared Al<sup>3+</sup> conc.<br/>(mM)</b> | <b>Measured F<sup>-</sup> conc.<br/>with TISAB 1<br/>(ppm)</b> | <b>Measured F<sup>-</sup> conc.<br/>with TISAB 2<br/>(ppm)</b> |
|-----------------------------------------------|------------------------------------------------|----------------------------------------------------------------|----------------------------------------------------------------|
| □10                                           | 10                                             | 0.0687                                                         | 9.91                                                           |
|                                               | 100                                            | 0.0155                                                         | 8.70                                                           |
| 100                                           | 10                                             | 0.578                                                          | 96.8                                                           |
|                                               | 100                                            | 0.0722                                                         | 77.3                                                           |
| 200                                           | 10                                             | 1.46                                                           | 192                                                            |
|                                               | 100                                            | 0.139                                                          | 142                                                            |

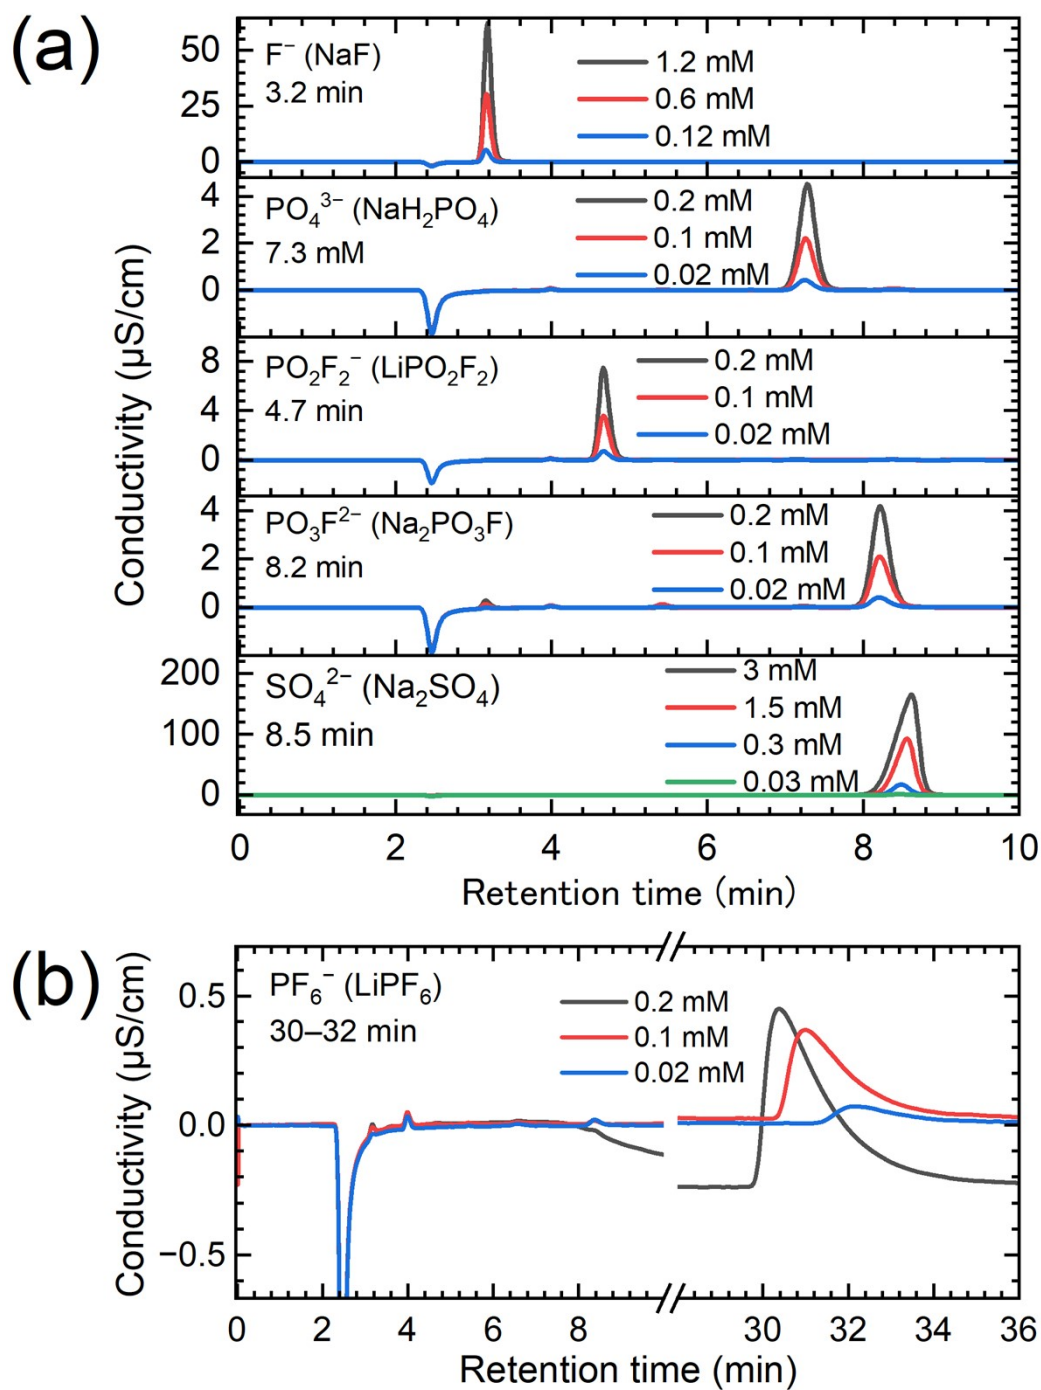

Fig. S-1 Ion chromatograms of standard solutions of (a) NaF,  $\text{NaH}_2\text{PO}_4$ ,  $\text{LiPO}_2\text{F}_2$ ,  $\text{Na}_2\text{PO}_3\text{F}$ ,  $\text{Na}_2\text{SO}_4$ , and (b)  $\text{LiPF}_6$ .

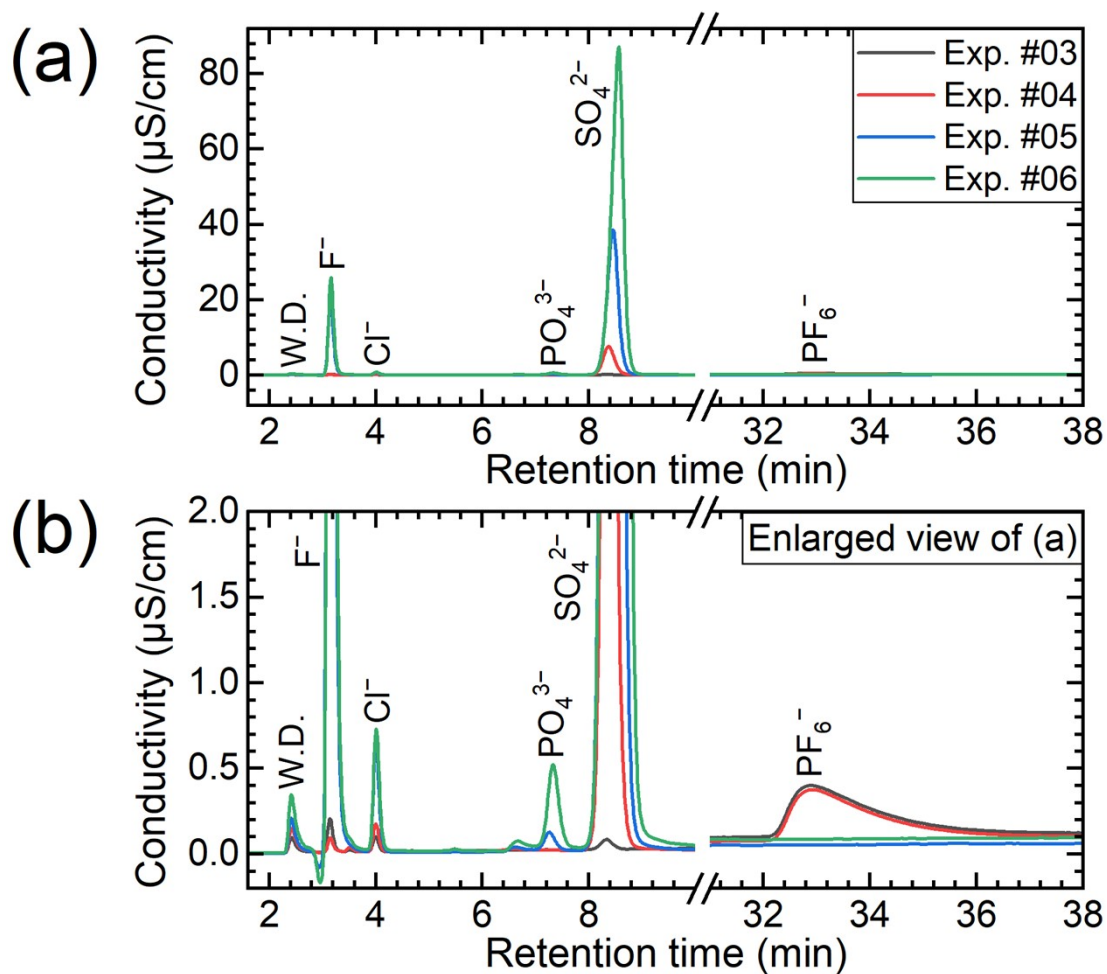

Fig. S-2 (a) Ion chromatograms of the supernatant of sample solutions after keeping 10 mM  $\text{LiPF}_6$  + 108 mM  $\text{Ca}(\text{OH})_2$  + 0–200 Al-mM  $\text{Al}_2(\text{SO}_4)_3$  solutions at 90 °C for 24 h according to procedure B and (b) enlarged view of (a). The sample solutions were diluted one hundredfold with the eluent and 20  $\mu\text{L}$  of diluted solution were injected. The prepared concentration of  $\text{Al}_2(\text{SO}_4)_3$  was 0 Al-mM in Exp. #03, 50 Al-mM in Exp. #04, 100 Al-mM in Exp. #05, and 150 Al-mM in Exp. #06. (W.D. = Water Dip)

**Input data for running PHREEQC at the condition A shown in Table 2.**

---

PHASES

Ettringite

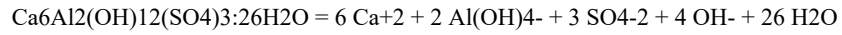

log\_k -44.9

SOLUTION 1

pH 4 charge

units mmol/L

Al 50

S 75

P 5

F 30

Li 5

EQUILIBRIUM\_PHASES 1

Ettringite 0.0 0.0

Gypsum 0.0 0.0

Hydroxylapatite 0.0 0.0

Fluorite 0.0 0.0

Gibbsite 0.0 0.0

Portlandite 0.0 0.0

USER\_GRAPH

-headings Ca(OH)<sub>2</sub> pH Ettringite Gypsum Hydroxylapatite Fluorite Gibbsite Portlandite

-axis\_titles Ca(OH)<sub>2</sub> pH precipitate

-start

10 graph\_x RXN

20 graph\_y -la("H+")

30 graph\_sy EQUI("ettringite") EQUI("Gypsum") EQUI("Hydroxylapatite")

EQUI("Fluorite") EQUI("Gibbsite") EQUI("Portlandite")

-end

REACTION 1

Ca(OH)<sub>2</sub> 1

0.25 moles par 500 steps

END

---

**Input data for running PHREEQC at the condition B for Al/Ca < 2/3 shown in Table 2.**

---

PHASES

Ettringite

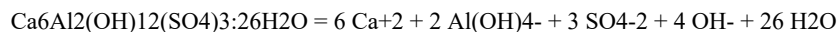

log\_k -44.9

SOLUTION\_MASTER\_SPECIES

# PF6- is defined as X-

X X- 0.0 145 145

SOLUTION\_SPECIES

X- = X-

log\_k 0.0

SOLUTION 2

pH 12 charge

units mmol/L

Ca 108

Li 10

X 10

EQUILIBRIUM\_PHASES 1

Ettringite 0.0 0.0

Gypsum 0.0 0.0

Hydroxylapatite 0.0 0.0

Fluorite 0.0 0.0

Gibbsite 0.0 0.0

Portlandite 0.0 0.0

USER\_GRAPH

-headings Al2(SO4)3 pH Ettringite Gypsum Hydroxylapatite Fluorite Gibbsite Portlandite

-axis\_titles Al2(SO4)3 pH precipitate

-start

10 graph\_x RXN

20 graph\_y -la("H+")

30 graph\_sy EQUI("ettringite") EQUI("Gypsum") EQUI("Hydroxylapatite")

EQUI("Fluorite") EQUI("Gibbsite") EQUI("Portlandite")

-end

REACTION 1

Al2(SO4)3 1

0.1 moles par 500 steps

END

---

**Input data for running PHREEQC at the condition B for Al/Ca > 2/3 shown in Table 2.**

---

PHASES

Ettringite

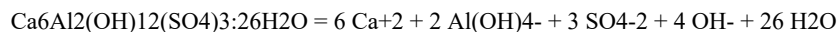

log\_k -44.9

SOLUTION 3

pH 12 charge

units mmol/L

Ca 108

Li 10

P 10

F 60

EQUILIBRIUM\_PHASES 1

Ettringite 0.0 0.0

Gypsum 0.0 0.0

Hydroxylapatite 0.0 0.0

Fluorite 0.0 0.0

Gibbsite 0.0 0.0

Portlandite 0.0 0.0

USER\_GRAPH

-headings Al2(SO4)3 pH Ettringite Gypsum Hydroxylapatite Fluorite Gibbsite Portlandite

-axis\_titles Al2(SO4)3 pH precipitate

-start

10 graph\_x RXN

20 graph\_y -la("H+")

30 graph\_sy EQUI("ettringite") EQUI("Gypsum") EQUI("Hydroxylapatite")

EQUI("Fluorite") EQUI("Gibbsite") EQUI("Portlandite")

-end

REACTION 1

Al2(SO4)3 1

0.1 moles par 500 steps

END

---
